# Supplementary material for: Methylation matters: binding of Ets-1 to the demethylated Foxp3 gene contributes to the stabilization of Foxp3 expression in regulatory T cells
Source: PubMed Central journal article supplement — J Mol Med (Berl). 2010 Jun 24;88(10):1029–40. doi: 10.1007/s00109-010-0642-1 (PMC2943068; doi:10.1007/s00109-010-0642-1), 2010-06-24
Supplement: 109_2010_642_MOESM1_ESM.pdf [file 109_2010_642_MOESM1_ESM.pdf]

## Supplementary Material

### **Methylation matters: Binding of Ets-1 to the demethylated *Foxp3* gene contributes to the stabilization of Foxp3 expression in regulatory T cells**

Julia K. Polansky<sup>1,2,\*</sup>, Lisa Schreiber<sup>1,\*</sup>, Christoph Thelemann<sup>3</sup>, Leif Ludwig<sup>3</sup>, Melanie Krüger<sup>4</sup>,  
Ria Baumgrass<sup>4</sup>, Sascha Cording<sup>1</sup>, Stefan Floess<sup>1</sup>, Alf Hamann<sup>3</sup> and Jochen Huehn<sup>1</sup>

<sup>1</sup>Experimental Immunology, Helmholtz Centre for Infection Research, Inhoffenstr. 7, 38124  
Braunschweig, Germany

<sup>2</sup>current address: Immunobiology, Leibniz-Center for Medicine and Biosciences, Parkallee  
30, 23845 Borstel, Germany

<sup>3</sup>Experimental Rheumatology, Charité University Medicine Berlin and German Rheumatism  
Research Center, Charitéplatz 1, 10117 Berlin, Germany

<sup>4</sup>Signal Transduction, German Rheumatism Research Center, Charitéplatz 1, 10117 Berlin,  
Germany

Table 1: Primer sequences used for cloning of luciferase-reporter sequences. All primers were purchased from Operon. Introduced restriction sites are indicated in bold, introduced mutations are underlined. Primer sequences which were needed in the reverse complement orientation, too, are marked with an asterics, but only one sequence is depicted.

| Name              | Sequence 5' - 3'                   | used for cloning of                                                                           |
|-------------------|------------------------------------|-----------------------------------------------------------------------------------------------|
| FoxPro_Asp718_for | GATCGGTACCATTACATGGCAGGCTTCAG      | FoxPro-LUC                                                                                    |
| FoxPro_XhoI_rev   | GATCCTCGAGCCAAAGTCTTACCTGGAGT      | FoxPro-LUC                                                                                    |
| TSDR_Asp718_for   | GATCGGTACCAAGTTGTCCCAGGAGAGC       | TSDR-LUC                                                                                      |
| TSDR_XmaI_rev     | GATCCCCGGGCATATGGCTGGACCATGG       | TSDR-LUC                                                                                      |
| TSDR_A_SpeI_for   | CATGACTAGTAAGTTGTCCCAGGAGAGC       | TSDR-FoxPro-Luc<br>A-FoxPro-LUC<br>and all point mutations                                    |
| TSDR_B_SpeI_for   | GATCACTAGTAATGGAGCTCAGGAGGGA       | B-FoxPro-LUC<br>BCD-FoxPro-LUC                                                                |
| TSDR_C_SpeI_for   | GATCACTAGTTAGCCAGATGGACGTCAC       | C-FoxPro-LUC<br>CD-FoxPro-LUC                                                                 |
| TSDR_D_SpeI_for   | GATCACTAGTGTCCCAGAAACAACCTCC       | D-FoxPro-LUC                                                                                  |
| TSDR_A_EcoRI_rev  | GATCGAATTCCTCCCTCCTGAGCTCCATT      | A-FoxPro-LUC                                                                                  |
| TSDR_B_EcoRI_rev  | GATCGAATTCGTGACGTCCATCTGGCTA       | B-FoxPro-LUC                                                                                  |
| TSDR_C_EcoRI_rev  | GATCGAATTCGGAGGTTGTTTCTGGGAC       | C-FoxPro-LUC                                                                                  |
| TSDR_D_EcoRI_rev  | GATCGAATTCATATGGCTGGACCATGG        | TSDR-FoxPro-Luc<br>BCD-FoxPro-LUC<br>CD-FoxPro-LUC<br>D-FoxPro-LUC<br>and all point mutations |
| mutEBS1_for*      | GACGTCACCTACCACAGACGCTAGCACCCACATC | TSDR-mutEBS1-FoxPro-LUC                                                                       |
| mutEBS2_for*      | GATGAAGCCCAATGCAGACGGCCGCCATGACGTC | TSDR-mutEBS2-FoxPro-LUC<br>TSDR-mutEBS1/2-FoxPro-LUC                                          |
| mutCBS1_for*      | ATGGTAGCCAGATGGTGGTCACCTACCACATC   | TSDR-mutCBS1-FoxPro-LUC                                                                       |
| mutCBS2_for*      | CATCCGGCCGCCATGIGTCAATGGCAGAAAA    | TSDR-mutCBS2-FoxPro-LUC<br>TSDR-mutCBS1/2-FoxPro-LUC                                          |
| NFkB_G2T_for*     | CACCCTACCTGIGCCTATCCGG             | TSDR-NFkB_G2T-FoxPro-LUC                                                                      |
| NFkB_T8G_for*     | CTGGGCCTAGCCGGCTACAGG              | TSDR-NFkB_T8G-FoxPro-LUC                                                                      |
| TSDR_PstI_for     | GATCCTGCAGAAGTTGTCCCAGGAGAGC       | TSDR-Pro-LUC (pCpGL)                                                                          |
| TSDR_SpeI_rev     | GATCACTAGTCATATGGCTGGACCATGG       | TSDR-Pro-LUC (pCpGL)                                                                          |
| mCpG1-for*        | GCATTCGTATGTATGAACTTTGCAAG         | TSDR(mutCpG1)-FoxPro-LUC                                                                      |
| mCpG2-for*        | GAGATTCTAAAATCATTGGCTTTGAGA        | TSDR(mutCpG2)-FoxPro-LUC                                                                      |
| mCpG3-for*        | GCTTTGAGAAATGATATAGTACAGTTCTGAG    | TSDR(mutCpG3)-FoxPro-LUC                                                                      |
| mCpG4-for*        | CCAAGAAAGACAGAATTGATAGAACTTGGG     | TSDR(mutCpG4)-FoxPro-LUC                                                                      |
| mCpG5-for*        | GCCAGATGGAAGTACCTACCAC             | TSDR(mutCpG5)-FoxPro-LUC                                                                      |
| mCpG6-for*        | CCTACCACATCAGCTAGCACCCAC           | TSDR(mutCpG6)-FoxPro-LUC                                                                      |
| mCpG7-for*        | CTGGGCCTATCIGGCTACAGG              | TSDR(mutCpG7)-FoxPro-LUC                                                                      |
| mCpG8-for*        | GCCACTTCTGAGAACGAAACCTG            | TSDR(mutCpG8)-FoxPro-LUC                                                                      |
| mCpG9-for*        | CCACTTCTCGGAAAGAAACCTGTGG          | TSDR(mutCpG9)-FoxPro-LUC                                                                      |
| mCpG10-for*       | CTCCTTGTGCTGATGAAGCCCAATG          | TSDR(mutCpG10)-FoxPro-LUC                                                                     |
| mCpG11-for*       | CAATGCATCCAGCCGCCA                 | TSDR(mutCpG11)-FoxPro-LUC                                                                     |
| mCpG12-for*       | CATCCGGCTGCCATGACG                 | TSDR(mutCpG12)-FoxPro-LUC                                                                     |
| mCpG13-for*       | CCGCCATGAGTTCAATGGCAG              | TSDR(mutCpG13)-FoxPro-LUC                                                                     |
| mCpG14-for*       | CCAGATGTAGACCCAAATAGGAAAAC         | TSDR(mutCpG14)-FoxPro-LUC                                                                     |
| mCpG15-for*       | CAAACAGGAAAGCCCAACAGAC             | TSDR(mutCpG15)-FoxPro-LUC                                                                     |
| TSDR_for          | AAGTTGTCCCAGGAGAGC                 | all point mutations                                                                           |

Table 2: IRD700-labeled and unlabeled oligonucleotide sequences used for EMSA. Underlined bases indicate mutations. mC represents a methylated cytosine.

| Name            | Sequence 5' - 3'                                  |
|-----------------|---------------------------------------------------|
| EBS-1_for       | IRD700-ACGTCACCTACCACATCCGCTAGCACCCACATC          |
| EBS-1_rev       | IRD700-GATGTGGGTGCTAGCGGATGTGGTAGGTGACGT          |
| EBS-2_for       | IRD700-ATGAAGCCCAATGCATCCGGCCGCCA                 |
| EBS-2_rev       | IRD700-TGGCGGCCGGATGCATTGGGCTTCAT                 |
| mutEBS-1_for    | IRD700-ACGTCACCTACCACAG <u>AC</u> GCTAGCACCCACATC |
| mutEBS-1_rev    | IRD700-GATGTGGGTGCTAGCG <u>ICT</u> GTGGTAGGTGACGT |
| mutEBS-2_for    | IRD700-ATGAAGCCCAATGCAG <u>AC</u> GGCCGCCA        |
| mutEBS-2_rev    | IRD700-TGGCGGCCG <u>ICT</u> GCATTGGGCTTCAT        |
| methEBS-1_for   | IRD700-ACGTCACCTACCACATCmCGCTAGCACCCACATC         |
| methEBS-1_rev   | IRD700-GATGTGGGTGCTAGmCGGATGTGGTAGGTGACGT         |
| methEBS-2_for   | IRD700-ATGAAGCCCAATGCATCmCGGCCGCCA                |
| methEBS-2_rev   | IRD700-TGGCGGCmCGGATGCATTGGGCTTCAT                |
| Ets1-ctrl.1_for | CCAGAGGAGGAAGTGTAGGAGCAGGT                        |
| Ets1-ctrl.1_rev | ACCTGCTCCTACACTTCCTCCTCTGG                        |
| Ets1-ctrl.2_for | GATCTCGAGCCGGAAGTTCGA                             |
| Ets1-ctrl.2_rev | TCGAACTTCCGGCTCGAGATC                             |
| CREB_TSDR_for   | GGCCGCCATGACGTCAATGGCAG                           |
| CREB_TSDR_rev   | CTGCCATTGACGTCATGGCGGCC                           |
